# Supplementary material for: Thermoplastic polyurethane/silicone rubber (TPU/SiR) thermoplastic elastomers with fine phase structures and comfortable textures based on polymerization-induced phase separation
Source: Royal Society of Chemistry journal article supplement (doi:10.1039/d4py01209g), 2024-12-16
Supplement: d4py01209g1.pdf [file d4py01209g1.pdf]

## Supporting Information

**Thermoplastic Polyurethane/Silicone Rubber (TPU/SiR)**

**Thermoplastic Elastomers with Fine Phase Structure and  
Comfortable Texture based on Polymerization-induced Phase  
Separation**

*Xu-tong Guo, <sup>a</sup> Ge-ge Lv, <sup>a</sup> Xin-yue Hao, <sup>a</sup> Nan-ying Ning, <sup>a, b, c</sup>, Bing Yu, <sup>a, b, c</sup>, \* Ming Tian, <sup>a, b, c</sup>, \**

<sup>a</sup> State Key Laboratory of Organic-Inorganic Composites, Beijing University of Chemical Technology, Beijing 100029, China

<sup>b</sup> Beijing Advanced Innovation Center for Soft Matter Science and Engineering, Beijing University of Chemical Technology, Beijing 100029, China

<sup>c</sup> Key Laboratory of Carbon Fiber and Functional Polymers, Ministry of Education, Beijing University of Chemical Technology, Beijing 100029, China

\*Corresponding author: [tianm@mail.buct.edu.cn](mailto:tianm@mail.buct.edu.cn); [yubing@mail.buct.edu.cn](mailto:yubing@mail.buct.edu.cn)

## Experimental Section

**Table S1.** The formulation for preparation of TPU/SiR TPEs with different pre-polymerization time

| Sample               | Formula |       |       |        |        | pre-polymerization |
|----------------------|---------|-------|-------|--------|--------|--------------------|
|                      | PTMG/g  | MDI/g | BDO/g | PDMS/g | DCBP/g | time/min           |
| TPU/PDMS             | 31.43   | 15.73 | 2.83  | 20     | 0      | 90                 |
| TPU/PDMS-crosslinked | 31.43   | 15.73 | 2.83  | 20     | 1      | 40                 |
| TPU/SiR-10min        | 31.43   | 15.73 | 2.83  | 20     | 1      | 10                 |
| TPU/SiR-15min        | 31.43   | 15.73 | 2.83  | 20     | 1      | 15                 |
| TPU/SiR-20min        | 31.43   | 15.73 | 2.83  | 20     | 1      | 20                 |
| TPU/SiR-25min        | 31.43   | 15.73 | 2.83  | 20     | 1      | 25                 |
| TPU/SiR-30min        | 31.43   | 15.73 | 2.83  | 20     | 1      | 30                 |

**Table S2.** The formulation for preparation of TPU/SiR TPEs with different SiR content

| Sample          | Formula |       |       |        |        | pre-polymerization |
|-----------------|---------|-------|-------|--------|--------|--------------------|
|                 | PTMG/g  | MDI/g | BDO/g | PDMS/g | DCBP/g | time/min           |
| TPU/SiR-22 wt.% | 31.43   | 15.73 | 2.83  | 15     | 0.75   | 20                 |
| TPU/SiR-28 wt.% | 31.43   | 15.73 | 2.83  | 20     | 1.00   | 20                 |
| TPU/SiR-33 wt.% | 31.43   | 15.73 | 2.83  | 25     | 1.25   | 20                 |

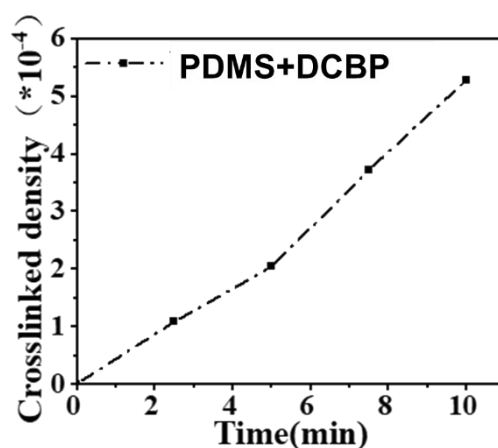

## Additional Discussion

**Fig S1.** The crosslinking density of PDMS-crosslinked with different crosslinking time

**Table S3.** Statistics of the Cross-linking density of the samples

| Sample                                                      | TPU       | Crosslinked PDMS | TPU/PDMS  | TPU/PDMS-crosslinked |
|-------------------------------------------------------------|-----------|------------------|-----------|----------------------|
| Density/g*cm <sup>-1</sup>                                  | 1.07±0.08 | 0.83±0.11        | 1.02±0.15 | 0.98±0.06            |
| Crosslinking density/10 <sup>-4</sup> *mol*cm <sup>-1</sup> | 3.01±0.41 | 5.30±0.12        | 3.10±0.16 | 7.18±0.20            |

**Table S4.** The performance data of the TPU/SiR TPEs with different pre-polymerization time

| Sample | Tensile Strength (MPa) | Elongation of break (%) | Permanent deformation (%) | Hysteresis deformation (%) |
|--------|------------------------|-------------------------|---------------------------|----------------------------|
| 10min  | 8.5±1.3                | 388±48                  | 17.5±2.1                  | 51.4±2.0                   |
| 15min  | 10.2±1.2               | 421±43                  | 17.8±1.8                  | 52.2±2.7                   |
| 20min  | 12.9±0.9               | 450±37                  | 16.1±1.7                  | 48.6±1.4                   |
| 25min  | 10.0±1.7               | 436±39                  | 17.6±2.9                  | 53.5±1.9                   |
| 30min  | 11.4±1.5               | 434±41                  | 16.3±1.8                  | 52.8±2.2                   |

**Table S5.** The performance data of the TPU/SiR TPEs system with different SiR dispersed phase content

| Sample | Tensile | Elongation | Permanent | Hysteresis |
|--------|---------|------------|-----------|------------|
|--------|---------|------------|-----------|------------|

|                | strength (MPa) | of break (%) | deformation(%) | deformation (%) |
|----------------|----------------|--------------|----------------|-----------------|
| TPU            | $22.9 \pm 2.2$ | $700 \pm 49$ | $27.6 \pm 0.3$ | $58.1 \pm 2.7$  |
| TPU/SiR-22wt.% | $13.5 \pm 0.8$ | $528 \pm 37$ | $15.9 \pm 1.5$ | $51.9 \pm 0.9$  |
| TPU/SiR-28wt.% | $12.9 \pm 0.9$ | $450 \pm 37$ | $16.1 \pm 1.7$ | $48.6 \pm 1.4$  |
| TPU/SiR-33wt.% | $10.9 \pm 1.5$ | $434 \pm 44$ | $19.2 \pm 2.4$ | $55.1 \pm 1.2$  |

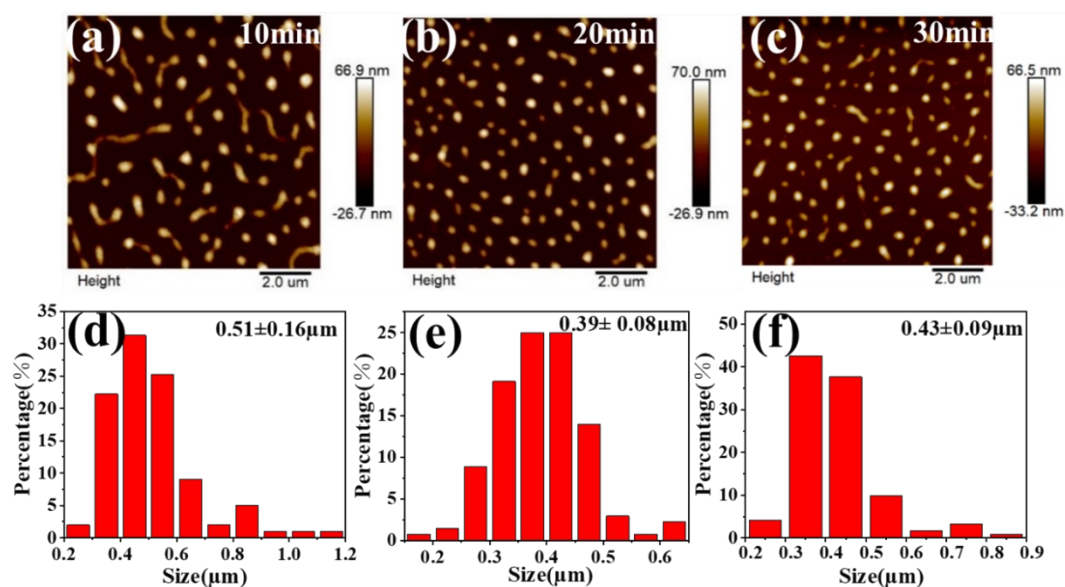

**Fig S2.** The AFM diagram TPU/SiR TPES with different pre-polymerization time (a) 10 min (b) 20 min (c) 30 min; and the diagram of particle size distribution (d) 10 min (e) 20 min (f) 30 min

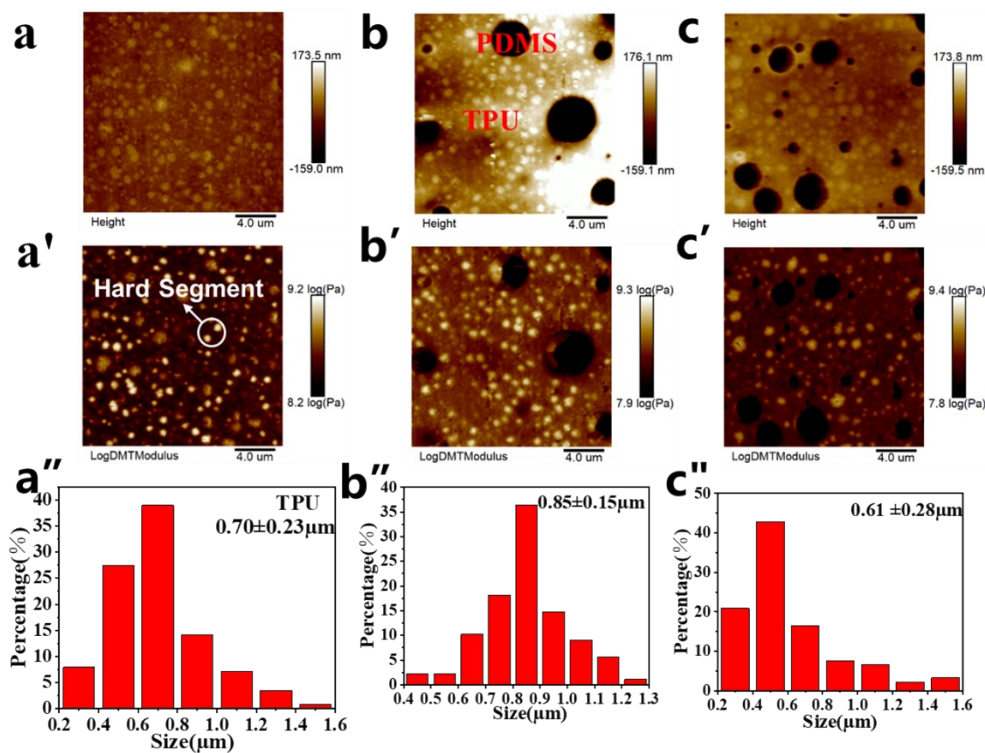

**Fig S3.** The AFM height images (a, b, c), modulus images (a', b', c'), and TPU hard segment size distribution of the samples (a'', b'', c''): (a, a', a'') pure TPU; (b, b', b'') TPU/PDMS; and (c, c', c'') TPU/SiR-28 wt.%

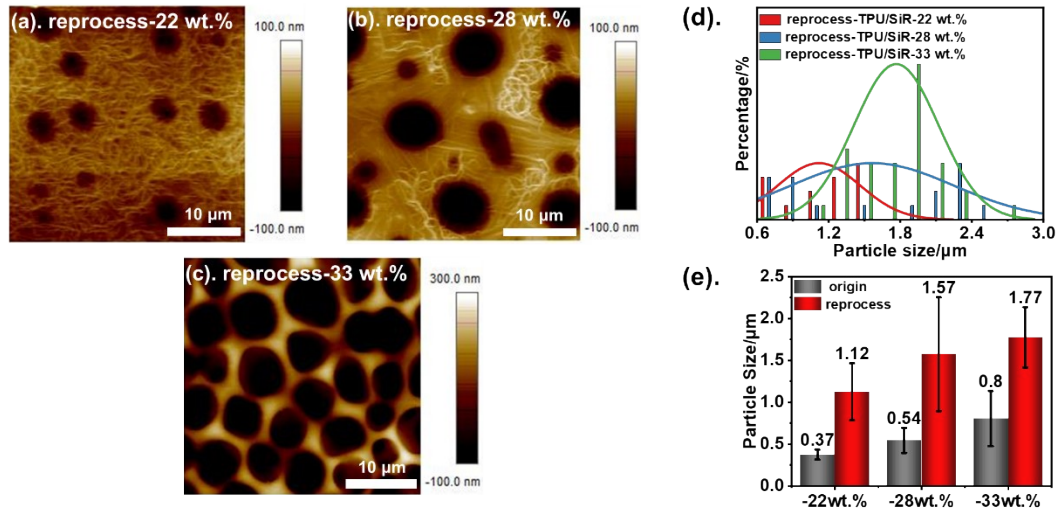

**Fig S4.** The AFM image of TPU/SiR TPEs with different SiR dispersed phase content after repetitive processing: (a) TPU/SiR-22 wt.%; (b) TPU/SiR-28wt.%; (c) TPU/SiR-33 wt.%; (d) the size distribution diagram and (e). the comparison of SiR particle size before and after repetitive processing of TPU/SiR TPEs with different SiR dispersed phase content.

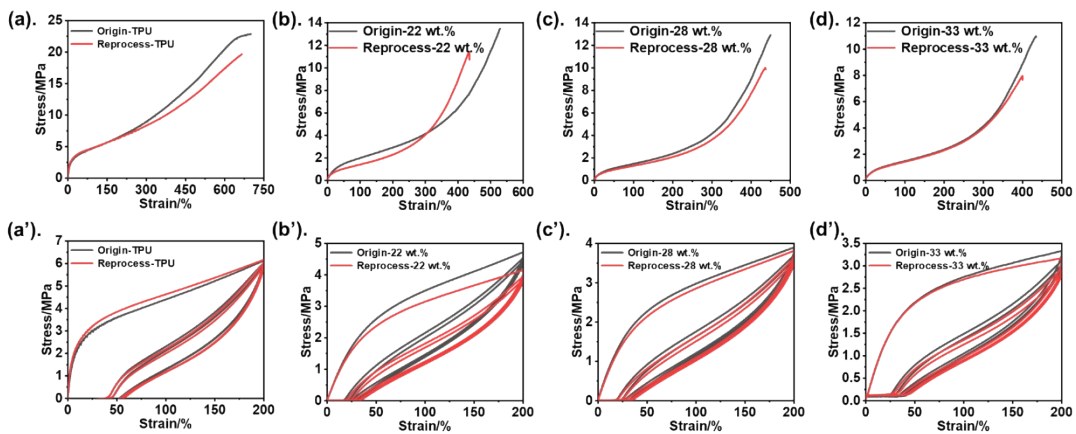

**Fig S5.** The Pure and TPU TPU/SiR TPEs samples with different SiR dispersed phase: (a, b, c, d). mechanical properties; (a', b', c', d'). tensile recovery properties.

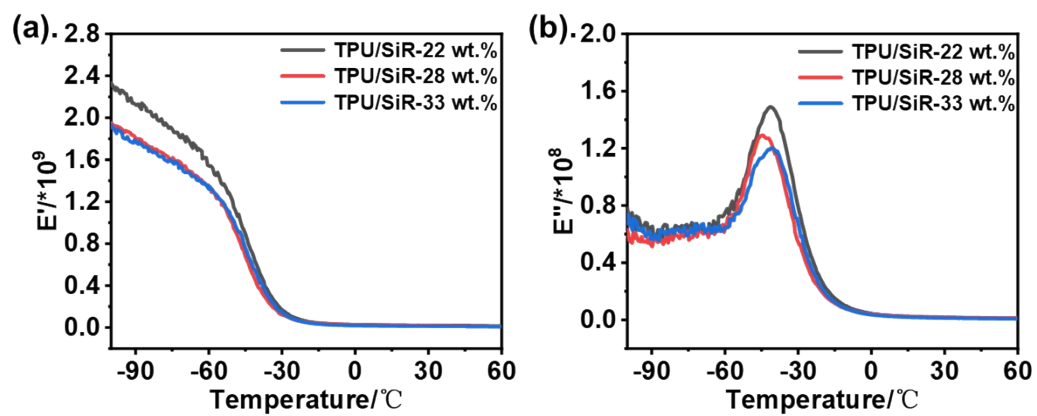

**Fig S6.** The TPU/SiR TPEs sample with different SiR dispersed phase content properties of (a) the storage modulus-temperature curves; (b) the loss modulus-temperature curves.
